# Supplementary material for: Molecular profile of KRAS G12C-mutant colorectal and non-small-cell lung cancer
Source: Springer Nature journal article supplement (doi:10.1186/s12885-021-07884-8), 2021-02-25
Supplement: MOESM1 [file 18903696]

## Molecular profile of *KRAS* G12C-mutant colorectal and non-small-cell lung cancer

Supplemental Table 1 - Distribution of colorectal cancer patients' characteristics according to *KRAS* status.

| Characteristics | <i>KRAS</i> G12C | <i>KRAS</i> Others | <i>KRAS</i> WT | p-value      |
|-----------------|------------------|--------------------|----------------|--------------|
| Age (years)     |                  |                    |                |              |
| < 40            | 13 (3.8)         | 150 (44.2)         | 176 (51.9)     | 0.727        |
| 40-49           | 17 (2.6)         | 310 (46.9)         | 334 (50.5)     | 0.464        |
| 50-59           | 46 (3.7)         | 530 (42.7)         | 665 (53.6)     | 0.142        |
| 60-69           | 50 (3.3)         | 671 (43.9)         | 809 (52.9)     | 0.252        |
| > 70            | 41 (3.6)         | 526 (46.7)         | 559 (49.6)     | Ref          |
| Gender, N (%)   |                  |                    |                |              |
| Male            | 86 (3.4)         | 1,074 (42.4)       | 1,375 (54.2)   | Ref          |
| Female          | 81 (3.4)         | 1,113 (47.1)       | 1,168 (49.4)   | <b>0.003</b> |
| Region, N (%)   |                  |                    |                |              |
| Southeast       | 127 (3.5)        | 1,651 (45.7)       | 1,836 (50.8)   | Ref          |
| South           | 19 (3.0)         | 253 (39.5)         | 369 (57.6)     | <b>0.007</b> |
| Northeast       | 5 (3.8)          | 61 (45.9)          | 67 (50.4)      | 0.986        |
| Middle West     | 12 (2.9)         | 189 (46.4)         | 206 (50.6)     | 0.824        |
| North           | 4 (3.9)          | 33 (32.4)          | 65 (63.7)      | <b>0.028</b> |

Abbreviations: WT, wild type; Ref, reference.

Supplemental Table 2 - Distribution of non-small cell lung cancer patients' characteristics according to *KRAS* status.

| Characteristics | <i>KRAS</i> G12C | <i>KRAS</i> Others | <i>KRAS</i> WT | p-value      |
|-----------------|------------------|--------------------|----------------|--------------|
| Age (years)     |                  |                    |                |              |
| < 40            | 0 (0.0)          | 5 (5.2)            | 92 (94.8)      | <0.001       |
| 40-49           | 6 (2.0)          | 19 (6.3)           | 277 (91.7)     | <0.001       |
| 50-59           | 67 (7.3)         | 132 (14.3)         | 723 (78.4)     | 0.788        |
| 60-69           | 144 (9.2)        | 230 (14.6)         | 1,198 (76.2)   | 0.114        |
| > 70            | 128 (7.2)        | 272 (15.3)         | 1,376 (77.5)   | Ref          |
| Gender, N (%)   |                  |                    |                |              |
| Male            | 172 (8.1)        | 304 (14.2)         | 1,665 (77.7)   | Ref          |
| Female          | 173 (6.8)        | 355 (14.0)         | 2,016 (79.2)   | 0.229        |
| Region, N (%)   |                  |                    |                |              |
| Southeast       | 211 (8.1)        | 375 (14.4)         | 2,013 (77.5)   | Ref          |
| South           | 55 (8.2)         | 109 (16.2)         | 508 (75.6)     | 0.497        |
| Northeast       | 39 (5.1)         | 91 (11.8)          | 639 (83.1)     | <b>0.002</b> |
| Middle West     | 34 (7.6)         | 63 (14.0)          | 352 (78.4)     | 0.892        |
| North           | 7 (3.6)          | 21 (10.6)          | 169 (85.8)     | <b>0.015</b> |

Abbreviations: WT, wild type; Ref, reference.
